# Supplementary material
Source: MDPI journal article supplement (https://www.mdpi.com/2311-5629/8/4/49)
Supplement: s1 [file s1]

Supporting information

## Decoration of Reduced Graphene Oxide with Magnesium Oxide during Reflux Reaction and Assessment of Its Antioxidant Properties

Aicha Bensouici, Nacera Baali, Roumaissa Bouloudenine and Giorgio Speranza

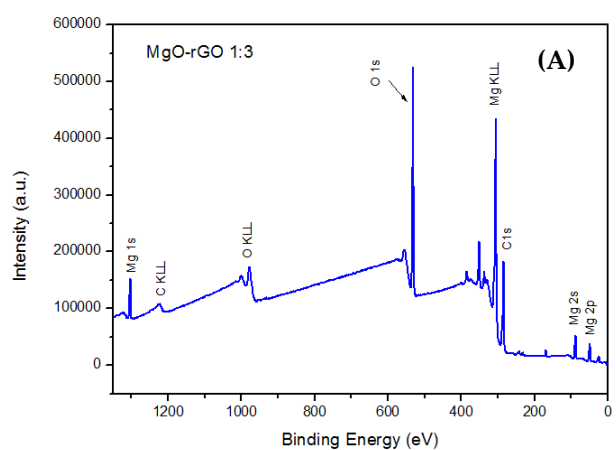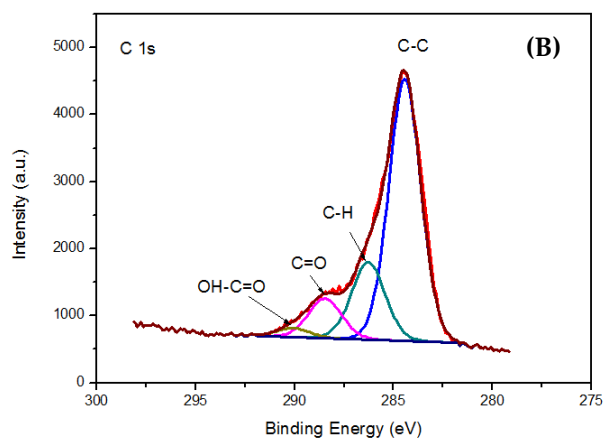

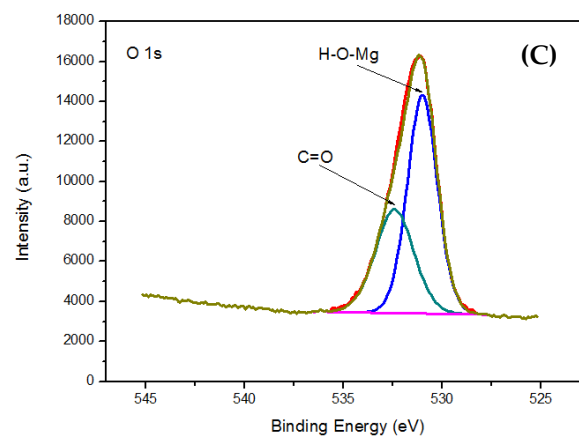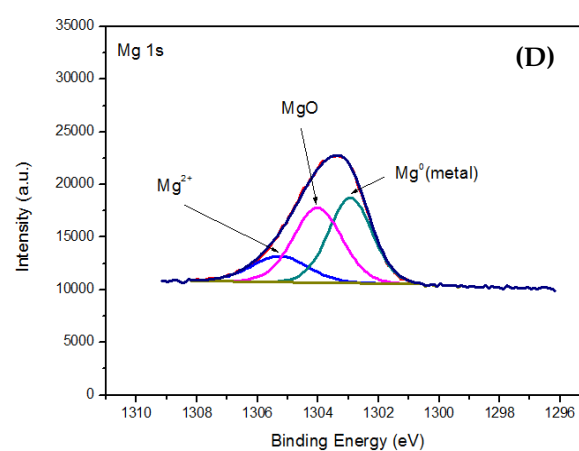

**Figure S1.** XPS Spectra of MgO-rGO1:3 nanocomposite. Survey spectrum (A), and high-resolution spectra of C1s (B), O1s (C) and Mg1s (D) .

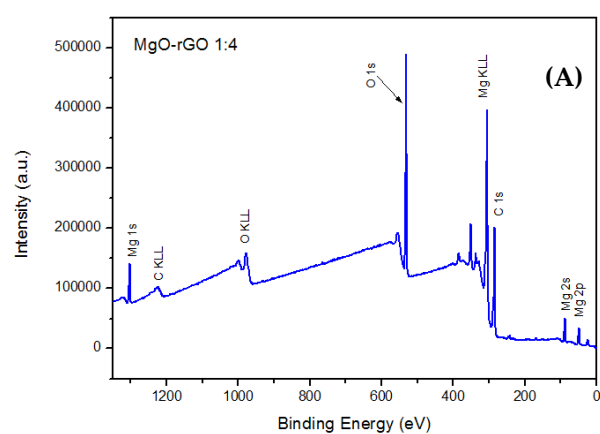

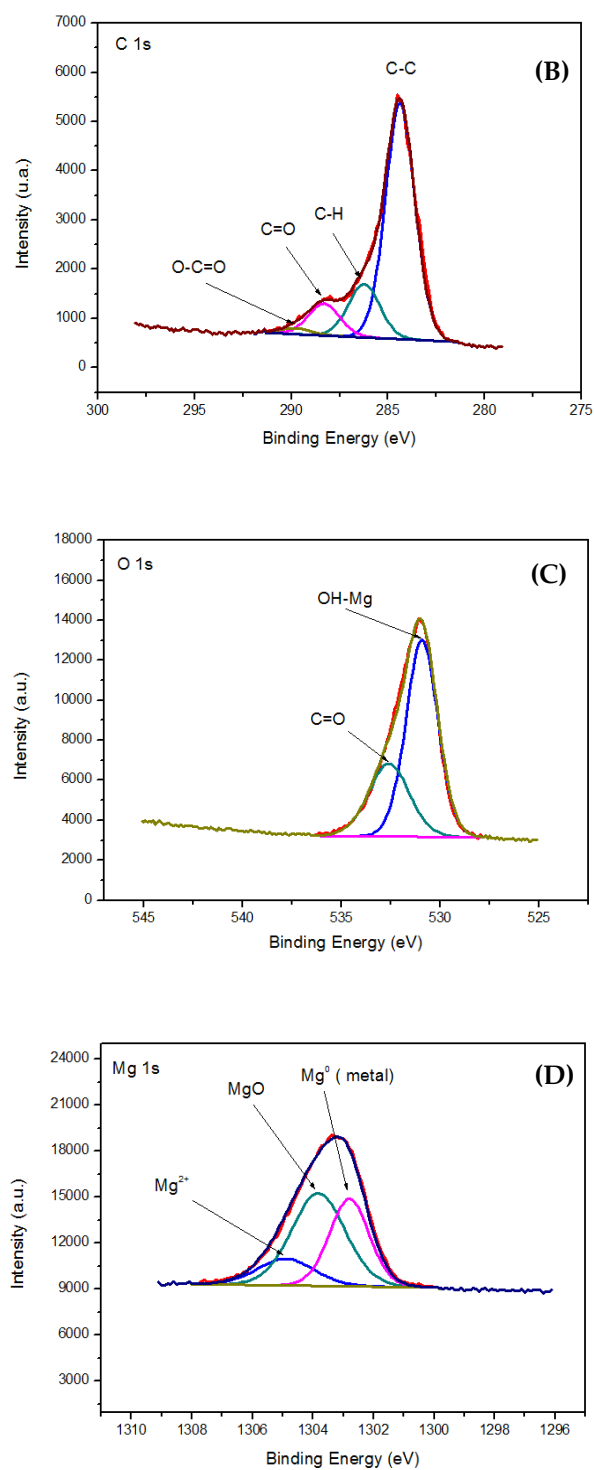

**Figure S2.** XPS Spectra of MgO-rGO1:4 nanocomposite. Survey spectrum (A), and high resolution spectra of C1s (B), O1s (C) and Mg1s (D) .
